# Supplementary material for: Mechanisms and therapeutic prospects of polyphenols as modulators of the aryl hydrocarbon receptor
Source: Royal Society of Chemistry journal article supplement (doi:10.1039/c6fo01810f), 2017-01-01
Supplement: c6fo01810f1.xlsx [file c6fo01810f1.xlsx]

## Sheet: Sheet1
S.1 Polyphenolic AHR ligands/agonists/antagonists.
Compounds	Verified as ligand	Agonistic Activity			Antagonistic Activity
		Cell/Test model	Dose (μM)	Reference	Cell/Test model	Dose (μM)	Reference
Curcumin	Yes	MCF-7	1-10	46	MCF-7	1-10	46
		SCC	1-50	73	Hep3B MCF7	5, 20	72
		-	-	-	Hepa-1c1c7	0.1-10	47
Resveratrol	Yes	Primary human keratinocytes	50	65	T-47D	10	78
		H1L1 *	7.3	86	MCF-7 HepG2	10	77
		-	-	-	SCC-9	20	127
		-	-	-	MCF-7 Caco-2	0.1-10	52
		-	-	-	MCF-10A	5-20	74
		-	-	-	HepG2	1-10	44,45
		-	-	-	Trout hepatocytes	25	Tsuji et al. 2007
		-	-	-	T-47D	5	51
		-	-	-	T-47D	10	75
Quercetin	Yes	MCF-7	5-10	49	MCF-7	1	Zhang et al. 2003
		HepG2	25-50	Vrba et al. 2012	HepG2 *	10	Hamada et al. 2006
		Caco-2	10	85	Primary porcine endothelial cells	100	79
		HuH7	10	154
Chrysin	Yes	MCF-7	15	82	HepG2 *	10	Hamada et al. 2006
		HepG2 *	20	55	-	-	-
		MCF-7 * HepG2 * Hepa-1c1c7 *	10	Zhang et al. 2003	-	-	-
		H1L1 *	14	86	-	-	-
		HCT116 DLD-1 SW837	10-100	156	-	-	-
Galangin	Yes	MCF-7	1-5	124	MCF-7	1-5	124
		Hepa-1c1c7 *	10	Zhang et al. 2003	HepG2 *	10	Hamada et al. 2006
		Hepa-1c1c7	60	57	H1L1.c2 *	5,10	57
Kaempferol	Yes	-	-	-	BEAS-2B HepG2 *	10	50
		-	-	-	MCF-7	1-10	49
		-	-	-	T-47D	10	78
		-	-	-	Caco-2	10	85
		-	-	-	Primary mouse hepatocytes	100	173
		-	-	-	Hepa-1c1c7	10	63
		-	-	-	MCF-7 *	1	Zhang et al. 2003
Baicalein	Yes	MCF-7 * HepG2 * Hepa-1c1c7 *	10	Zhang et al. 2003	HepG2 *	10	Hamada et al. 2006
		HSC-3 *	7-28	148	MCF-7	1-10	125
		Caco-2	25-100	59
		H1L1 *	2.8	86
Genistein		NIH 3T3 *	10	152	MCF-7	5-25	126
		Hepa-1c1c7 *	10	Zhang et al. 2003	-	-	-
		HepG2 *	10	Hamada et al. 2006	-	-	-
		HepG2 *	100	Bialesova et al. 2015	-	-	-
EGCG		-	-	-	Primary porcine endothelial cells	50	79
		-	-	-	Primary porcine vascular endothelial cells	25-50	130
		-	-	-	Hepa-1c1c7	200	70
		-	-	-	Hepa-2DLuc *	10-200	Palermo et al. 2003
Biochanin A		HepG2 *	100	Bialesova et al. 2015	-	-	-
		Yeast	0.25	Medjakovic et al. 2008	-	-	-
Flavone	Yes	MCF-7	10	Jung et al. 2007	HepG2 *	10	Hamada et al. 2006
Naringenin		NIH 3T3 *	10	152	MCF-7	1-10	80
		H1L1 *	53	86	HepG2 *	10	Hamada et al. 2006
Apigenin	Yes	Hepa-1c1c7 *	10	Zhang et al. 2003	HepG2 *	10	50
		NIH 3T3 *	10	152	HepG2 *	10	Hamada et al. 2006
		-	-	-	Hepa-1c1c7	10	63
For		HepG2 *	100	Bialesova et al. 2015	HepG2 *	10	Hamada et al. 2006
		Yeast	0.25	Medjakovic et al. 2008	-	-	-
Daidzein		Hepa-1c1c7 *	10	Zhang et al. 2003	HepG2 *	10	Hamada et al. 2006
		HepG2 *	10	Hamada et al. 2006	HepG2 *	1-10	50
		H1L1 *	3	86	-	-	-
Luteolin	Yes	-	-	-	MCF-7 * HepG2 *	10	Zhang et al. 2003
		-	-	-	HepG2 *	10	Hamada et al. 2006
		-	-	-	Hepa-1c1c7	10	63
		-	-	-	3T3-L1	50	67
Eriodictyol	Yes	-	-	-	Hepa-1c1c7	10	63
Hesperetin		NIH 3T3 *	10	152	-	-	-
		H1L1 *	38	86	-	-	-
EGC		-	-	-	Hepa-2DLuc *	10-200	Palermo et al. 2003
		-	-	-	Hepa-1c1c7	10	63
Pelargonidin	Yes	LS174T HepG2 *	10-50	54	-	-	-
PEL-2	Yes	HepG2	50	53	-	-	-
Icaritin	Yes	MCF-7	0.01-10	58	-	-	-
Myricetin		-	-	-	HepG2 *	10	Hamada et al. 2006
		-	-	-	Primary mouse hepatocytes	100	173
Piceatannol		-	-	-	T-47D	10	78
Carnosol		-	-	-	MSK-leuk1 HaCaT	1-10	71
DMF		-	-	-	Trout hepatocytes	25	Tsuji et al. 2007
		-	-	-	SCC-9	20	127
Rutin		NIH 3T3 *	10	152	-	-	-
Fisetin		NIH 3T3 *	10	152	-	-	-
Emodin		MCF-7 Hepa-1	10	Zhang et al. 2003	-	-	-
CYA-3		HepG2	50	53	-	-	-
Cantharidin		MCF-7 * HepG2 *	10	Zhang et al. 2003	-	-	-
Cirsinmaritin		H1L1 *	3	Amakura et al. 2011	-	-	-
Nepitrin		H1L1 *	3	Amakura et al. 2011	-	-	-
Heo		H1L1 *	3	Amakura et al. 2011	-	-	-
Glycitein		H1L1 *	4.2	86	-	-	-
Daidzin		H1L1 *	12	86	-	-	-
Genistin		H1L1 *	4.2	86	-	-	-
Baicelin		H1L1 *	32	86	-	-	-
Alizarin		H1L1 *	3.1	86	-	-	-
Flavonone		-	-	-	HepG2 *	10	Hamada et al. 2006
Morin		-	-	-	HepG2 *	10	Hamada et al. 2006
Tangeretin		-	-	-	HepG2 *	10	Hamada et al. 2006
Piperine		-	-	-	HepG2 *	10	50
Flavonol		-	-	-	HepG2 *	10	Hamada et al. 2006
* This cell line was stably transfected and used in cell-based luciferase reporter gene assays. Abbreviations: EGCG, epigallocatechin gallate; EGC, epigallocatechin; PEL-2, Pelargonidin-3-O-rutinoside; CYA-3, cyanidin-3,5-O-diglucoside, DMF, 5,7-dimethoxyflavone; Heo, Heomoplantagenin; For, Formononetin **References in red are as follow: 1 P. A. Tsuji and T. Walle. Chem Biol Interact, 2007, 169, …
